# Supplementary material for: Ascorbic Acid Deficiency Prevalence and Associated Cognitive Impairment in Alcohol Detoxification Inpatients: A Pilot Study
Source: MDPI journal article supplement (doi:10.3390/antiox10121892), 2021-11-26

# Ascorbic acid deficiency prevalence and associated cognitive impairment in alcohol detoxification inpatients: A pilot study

## SUPPLEMENTARY MATERIALS

Supplementary Materials Figure S1: Flow chart

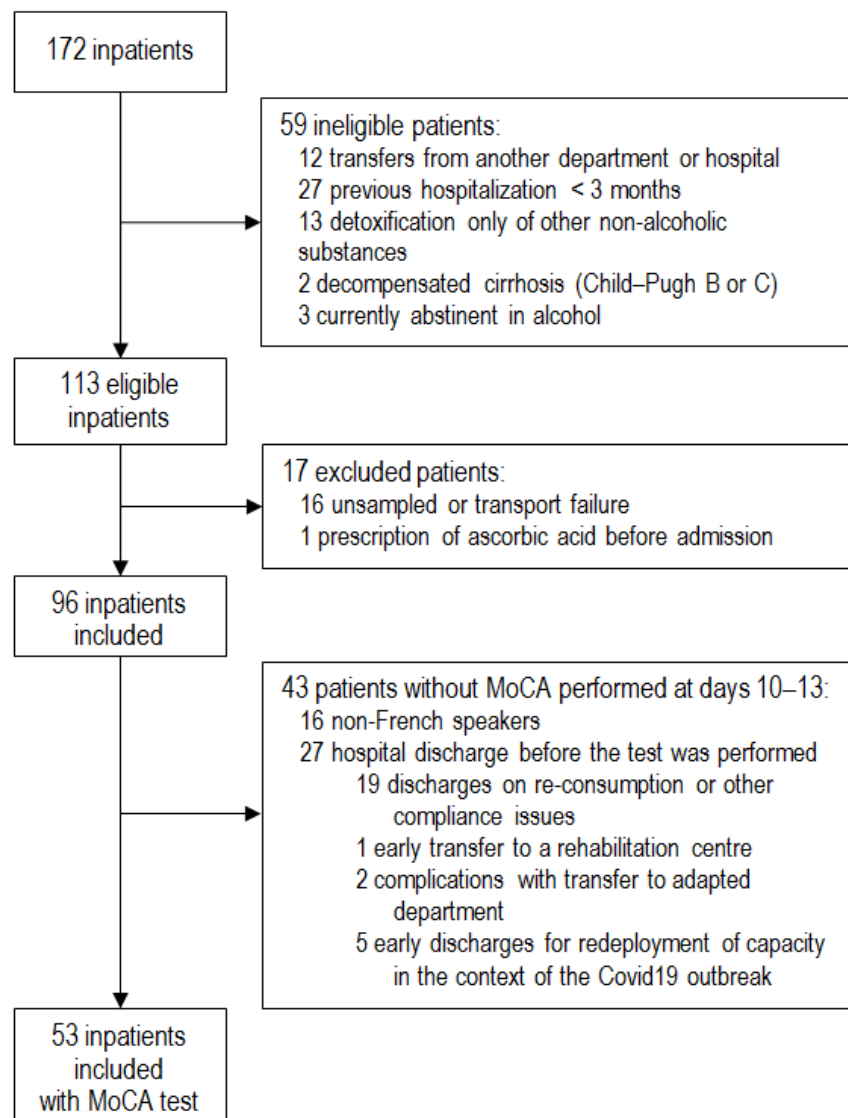

Supplement: s1 [file s1]
